# Supplementary material for: Effects of Forest Management on the Insect Assemblage of Black Cherry (Prunus serotina) in the Allegheny National Forest
Source: MDPI journal article supplement (doi:10.3390/plants11192596), 2022-10-01
Supplement: s1 [file s1]

**Table S1:** A list of understory herbaceous species found during the flowering period of black cherry

| Common name            | Family           | Genus                | Species               | Unmanaged stand | Seed-tree stand | Removal stand |
|------------------------|------------------|----------------------|-----------------------|-----------------|-----------------|---------------|
| Elderberry             | Adoxaceae        | <i>Sambucus</i>      | <i>spp.</i>           | X               |                 |               |
| Staghorn Sumac         | Anacardiaceae    | <i>Rhus</i>          | <i>typhina</i>        | X               |                 |               |
| Mountain Holly         | Aquifoliaceae    | <i>Ilex</i>          | <i>montana</i>        |                 | X               |               |
| Jack-in-the-pulpit     | Araceae          | <i>Arisaema</i>      | <i>triphyllum</i>     | X               |                 |               |
| Devil's walking stick  | Araliaceae       | <i>Aralia</i>        | <i>spinosa</i>        |                 | X               |               |
| Dwarf Ginseng          | Araliaceae       | <i>Panax</i>         | <i>trifolius</i>      | X               |                 |               |
| Canada Mayflower       | Asparagaceae     | <i>Maianthemum</i>   | <i>canadense</i>      | X               |                 | X             |
| Solomon's seal         | Asparagaceae     | <i>Polygonatum</i>   | <i>pubescens</i>      | X               |                 |               |
| Goldenrod              | Asteraceae       | <i>Solidago</i>      | <i>spp.</i>           |                 | X               |               |
| Mayapple               | Berberidaceae    | <i>Podophyllum</i>   | <i>peltatum</i>       | X               |                 |               |
| Black Birch            | Betulaceae       | <i>Betula</i>        | <i>lenta</i>          |                 | X               | X             |
| Sessile Bellwort       | Colchicaceae     | <i>Uvularia</i>      | <i>sessilifolia</i>   | X               |                 |               |
| Sedge                  | Cyperaceae       | <i>Carex</i>         | <i>debilis</i>        | X               | X               | X             |
| Pink Ladies Slipper    | Cypripedioideae  | <i>Cypripedium</i>   | <i>acaule</i>         | X               |                 |               |
| Hay-scented fern       | Dennstaedtiaceae | <i>Dennstaedtia</i>  | <i>punctilobula</i>   |                 |                 | X             |
| Intermediate Wood Fern | Dryopteridaceae  | <i>Dryopteris</i>    | <i>intermedia</i>     | X               | X               | X             |
| American Beech         | Fagaceae         | <i>Fagus</i>         | <i>grandifolia</i>    | X               | X               | X             |
| Indian Cucumber Root   | Liliaceae        | <i>Medeola</i>       | <i>virginiana</i>     | X               | X               |               |
| Trout Lily             | Liliaceae        | <i>Erythronium</i>   | <i>americanum</i>     | X               |                 |               |
| Creeping Ground cedar  | Lycopodiaceae    | <i>Diphasiastrum</i> | <i>digatatum</i>      | X               |                 | X             |
| Ground Pine            | Lycopodiaceae    | <i>Lycopodium</i>    | <i>dendroideum</i>    |                 | X               |               |
| Ground Pine            | Lycopodiaceae    | <i>Lycopodium</i>    | <i>obscurum</i>       | X               | X               |               |
| Running Ground Cedar   | Lycopodiaceae    | <i>Diphasiastrum</i> | <i>digatatum</i>      |                 |                 | X             |
| Shining clubmoss       | Lycopodiaceae    | <i>Huperzia</i>      | <i>lucidula</i>       | X               |                 |               |
| Cucumber Magnolia      | Magnoliaceae     | <i>Magnolia</i>      | <i>acuminata</i>      | X               | X               | X             |
| Tulip tree             | Magnoliaceae     | <i>Liriodendron</i>  | <i>tulipifera</i>     | X               | X               | X             |
| Painted Trillium       | Melanthiaceae    | <i>Trillium</i>      | <i>undulatum</i>      | X               | X               |               |
| White trillium         | Melanthiaceae    | <i>Trillium</i>      | <i>grandiflora</i>    | X               |                 |               |
| Green Ash              | Oleaceae         | <i>Fraxinus</i>      | <i>americana</i>      |                 | X               |               |
| Beechdrops             | Orobanchaceae    | <i>Epifagus</i>      | <i>virginiana</i>     | X               |                 |               |
| Cinnamon Fern          | Osmundaceae      | <i>Osmunda</i>       | <i>cinnamomea</i>     | X               |                 |               |
| Wood Sorrel            | Oxalidaceae      | <i>Oxalis</i>        | <i>montana</i>        | X               |                 |               |
| Eastern Hemlock        | Pinaceae         | <i>Tsuga</i>         | <i>canadensis</i>     | X               |                 |               |
| Deer Tongue Grass      | Poaceae          | <i>Dichanthelium</i> | <i>clandestine</i>    | X               |                 | X             |
| Short Husk Grass       | Poaceae          | <i>Brachyelytrum</i> | <i>erectum</i>        | X               |                 | X             |
| Starflower             | Primulaceae      | <i>Trientilla</i>    | <i>borealis</i>       | X               |                 |               |
| Blackberry             | Rosaceae         | <i>Rubus</i>         | <i>allegheniensis</i> | X               |                 | X             |
| Bristly Dewberry       | Rosaceae         | <i>Rubus</i>         | <i>hispidus</i>       | X               |                 |               |
| Pin Cherry             | Rosaceae         | <i>Prunus</i>        | <i>pensylvanica</i>   |                 | X               | X             |
| Raspberry              | Rosaceae         | <i>Rubus</i>         | <i>idaeus</i>         | X               |                 |               |
| Serviceberry           | Rosaceae         | <i>Amelanchier</i>   | <i>arborea</i>        | X               | X               |               |
| Black Cherry           | Rosaceae         | <i>Prunus</i>        | <i>serotina</i>       | X               | X               | X             |
| Chokecherry            | Rosaceae         | <i>Prunus</i>        | <i>virginiana</i>     |                 | X               |               |
| Partridgeberry         | Rubiaceae        | <i>Mitella</i>       | <i>repens</i>         | X               |                 |               |
| Red Maple              | Sapindaceae      | <i>Acer</i>          | <i>rubrum</i>         | X               | X               | X             |
| Striped Maple          | Sapindaceae      | <i>Acer</i>          | <i>pensylvanicum</i>  | X               | X               |               |
| New York Fern          | Thelypteridaceae | <i>Thelypteris</i>   | <i>noveboracensis</i> | X               |                 | X             |
| Round leaved violet    | Violaceae        | <i>Viola</i>         | <i>rotundifolia</i>   | X               | X               |               |
| Sweet White Violet     | Violaceae        | <i>Viola</i>         | <i>blanda</i>         | X               | X               | X             |
